# Supplementary material
Source: publisher figshare collection journal article supplement (https://acs.figshare.com/ndownloader/files/4589773)
Supplement: Supplementary file 1 [file 4589773]

data_t1 
  
_publ_contact_author_name        'Chi-Sing Lee' 
_publ_contact_author_address 
;312,F Building 
Shenzhen Graduata School of Peking University 
Xili, Shenzhen 
; 
_publ_contact_author_email       lizc@szpku.edu.cn 
_publ_contact_author_phone       0755-26032701 
_publ_contact_author_fax         0755-26035326 
loop_ 
_publ_author_name 
_publ_author_address 
'Lee, Chi-Sing' 
;312,F Building 
Shenzhen Graduata School of Peking University 
Xili, Shenzhen 
; 

_publ_requested_journal

 'Organic Letters'

_publ_section_title

 'Base-Catalyzed Diels-Alder Reactions of 2H-Pyran-2,5-diones'


_audit_creation_method            SHELXL-97 
_chemical_name_systematic 
; 
 ? 
; 
_chemical_name_common             ? 
_chemical_melting_point           ? 
_chemical_formula_moiety          'C16 H24 O8' 
_chemical_formula_sum 
 'C16 H24 O8' 
_chemical_formula_weight          344.35 
  
loop_ 
 _atom_type_symbol 
 _atom_type_description 
 _atom_type_scat_dispersion_real 
 _atom_type_scat_dispersion_imag 
 _atom_type_scat_source 
 'C'  'C'   0.0033   0.0016 
 'International Tables Vol C Tables 4.2.6.8 and 6.1.1.4' 
 'H'  'H'   0.0000   0.0000 
 'International Tables Vol C Tables 4.2.6.8 and 6.1.1.4' 
 'O'  'O'   0.0106   0.0060 
 'International Tables Vol C Tables 4.2.6.8 and 6.1.1.4' 
  
_symmetry_cell_setting            'triclinic' 
_symmetry_space_group_name_H-M    'p -1' 
  
loop_ 
 _symmetry_equiv_pos_as_xyz 
 'x, y, z' 
 '-x, -y, -z' 
  
_cell_length_a                    6.0385(3) 
_cell_length_b                    11.2413(6) 
_cell_length_c                    13.3832(8) 
_cell_angle_alpha                 93.881(4) 
_cell_angle_beta                  91.237(4) 
_cell_angle_gamma                 95.110(4) 
_cell_volume                      902.42(9) 
_cell_formula_units_Z             2 
_cell_measurement_temperature     293(2) 
_cell_measurement_reflns_used     3060 
_cell_measurement_theta_min       3.3802 
_cell_measurement_theta_max       28.8996 
  
_exptl_crystal_description        prism 
_exptl_crystal_colour             colorless 
_exptl_crystal_size_max           0.37 
_exptl_crystal_size_mid           0.13 
_exptl_crystal_size_min           0.13 
_exptl_crystal_density_meas       ? 
_exptl_crystal_density_diffrn     1.267 
_exptl_crystal_density_method     'not measured' 
_exptl_crystal_F_000              368 
_exptl_absorpt_coefficient_mu     0.102 
_exptl_absorpt_correction_type    'multi-scan' 
_exptl_absorpt_correction_T_min   0.87888 
_exptl_absorpt_correction_T_max   1.00000 
_exptl_absorpt_process_details    'CrysAlis RED, Oxford Diffraction Ltd.' 
  
_exptl_special_details 
; 
 ? 
; 
  
_diffrn_ambient_temperature       293(2) 
_diffrn_radiation_wavelength      0.71073 
_diffrn_radiation_type            MoK\a 
_diffrn_radiation_source          'fine-focus sealed tube' 
_diffrn_radiation_monochromator   graphite 
_diffrn_measurement_device_type   'Sapphire CCD detector' 
_diffrn_measurement_method        '\f and \w scans' 
_diffrn_detector_area_resol_mean  ? 
_diffrn_standards_number          ? 
_diffrn_standards_interval_count  ? 
_diffrn_standards_interval_time   ? 
_diffrn_standards_decay_%         ? 
_diffrn_reflns_number             6612 
_diffrn_reflns_av_R_equivalents   0.0216 
_diffrn_reflns_av_sigmaI/netI     0.0361 
_diffrn_reflns_limit_h_min        -7 
_diffrn_reflns_limit_h_max        6 
_diffrn_reflns_limit_k_min        -13 
_diffrn_reflns_limit_k_max        13 
_diffrn_reflns_limit_l_min        -14 
_diffrn_reflns_limit_l_max        15 
_diffrn_reflns_theta_min          3.39 
_diffrn_reflns_theta_max          25.00 
_reflns_number_total              3060 
_reflns_number_gt                 2012 
_reflns_threshold_expression      >2sigma(I) 
  
_computing_data_collection        'CrysAlis CCD, Oxford Diffraction Ltd.,' 
_computing_cell_refinement        'CrysAlis RED, Oxford Diffraction Ltd.,' 
_computing_data_reduction         'CrysAlis RED, Oxford Diffraction Ltd.,' 
_computing_structure_solution     'SHELXS-97 (Sheldrick, 1990)' 
_computing_structure_refinement   'SHELXL-97 (Sheldrick, 1997)' 
_computing_molecular_graphics     'WinGX v1.70.01' 
_computing_publication_material   ? 

_refine_special_details 
; 
 Refinement of F^2^ against ALL reflections.  The weighted R-factor wR and 
 goodness of fit S are based on F^2^, conventional R-factors R are based 
 on F, with F set to zero for negative F^2^. The threshold expression of 
 F^2^ > 2sigma(F^2^) is used only for calculating R-factors(gt) etc. and is 
 not relevant to the choice of reflections for refinement.  R-factors based 
 on F^2^ are statistically about twice as large as those based on F, and R- 
 factors based on ALL data will be even larger. 
; 
 
_refine_ls_structure_factor_coef  Fsqd  
_refine_ls_matrix_type            full 
_refine_ls_weighting_scheme       calc  
_refine_ls_weighting_details 
 'calc w=1/[\s^2^(Fo^2^)+(0.0601P)^2^+0.0000P] where P=(Fo^2^+2Fc^2^)/3' 
_atom_sites_solution_primary      direct 
_atom_sites_solution_secondary    difmap 
_atom_sites_solution_hydrogens    geom 
_refine_ls_hydrogen_treatment     constr 
_refine_ls_extinction_method      none 
_refine_ls_extinction_coef        ? 
_refine_ls_number_reflns          3060 
_refine_ls_number_parameters      223 
_refine_ls_number_restraints      0 
_refine_ls_R_factor_all           0.0641 
_refine_ls_R_factor_gt            0.0379 
_refine_ls_wR_factor_ref          0.0989 
_refine_ls_wR_factor_gt           0.0928 
_refine_ls_goodness_of_fit_ref    0.933 
_refine_ls_restrained_S_all       0.933 
_refine_ls_shift/su_max           0.000 
_refine_ls_shift/su_mean          0.000 
 
loop_ 
 _atom_site_label 
 _atom_site_type_symbol 
 _atom_site_fract_x 
 _atom_site_fract_y 
 _atom_site_fract_z 
 _atom_site_U_iso_or_equiv 
 _atom_site_adp_type 
 _atom_site_occupancy 
 _atom_site_symmetry_multiplicity 
 _atom_site_calc_flag 
 _atom_site_refinement_flags 
 _atom_site_disorder_assembly 
 _atom_site_disorder_group 
O6 O 1.15073(18) 0.12638(10) 0.13184(8) 0.0427(3) Uani 1 1 d . . . 
H6 H 1.1358 0.0896 0.1825 0.064 Uiso 1 1 calc R . . 
C8 C 0.8034(2) 0.21435(15) 0.13615(12) 0.0355(4) Uani 1 1 d . . . 
C6 C 0.7980(2) 0.21771(14) -0.04818(11) 0.0332(4) Uani 1 1 d . . . 
H6A H 0.7222 0.2914 -0.0447 0.040 Uiso 1 1 calc R . . 
O5 O 0.68318(18) 0.25509(12) 0.19838(9) 0.0561(4) Uani 1 1 d . . . 
C9 C 1.0567(2) 0.23824(14) 0.14651(12) 0.0335(4) Uani 1 1 d . . . 
O2 O 1.32429(18) 0.34903(12) -0.13931(10) 0.0573(4) Uani 1 1 d . . . 
C7 C 0.7204(2) 0.14620(15) 0.04063(12) 0.0382(4) Uani 1 1 d . . . 
H7A H 0.5593 0.1343 0.0397 0.046 Uiso 1 1 calc R . . 
H7B H 0.7781 0.0683 0.0357 0.046 Uiso 1 1 calc R . . 
C5 C 1.0482(2) 0.25467(14) -0.04353(11) 0.0326(4) Uani 1 1 d . . . 
H5 H 1.1272 0.1833 -0.0579 0.039 Uiso 1 1 calc R . . 
C4 C 1.1090(3) 0.34308(14) -0.11992(12) 0.0360(4) Uani 1 1 d . . . 
C10 C 1.1279(2) 0.31289(15) 0.05994(12) 0.0379(4) Uani 1 1 d . . . 
H10A H 1.2889 0.3260 0.0613 0.045 Uiso 1 1 calc R . . 
H10B H 1.0698 0.3904 0.0694 0.045 Uiso 1 1 calc R . . 
O4 O 0.51697(17) 0.11071(11) -0.15098(9) 0.0495(3) Uani 1 1 d . . . 
C11 C 1.1284(2) 0.30387(15) 0.24695(12) 0.0399(4) Uani 1 1 d . . . 
H11A H 1.2893 0.3177 0.2506 0.048 Uiso 1 1 calc R . . 
H11B H 1.0682 0.3812 0.2516 0.048 Uiso 1 1 calc R . . 
O8 O 0.9906(2) 0.30376(12) 0.41007(9) 0.0545(4) Uani 1 1 d . . . 
C2 C 0.7304(3) 0.15045(15) -0.14669(13) 0.0374(4) Uani 1 1 d . . . 
O3 O 0.8537(2) 0.13139(14) -0.21356(10) 0.0701(5) Uani 1 1 d . . . 
C12 C 1.0511(3) 0.23479(17) 0.33378(13) 0.0426(4) Uani 1 1 d . . . 
O7 O 1.0480(2) 0.12682(13) 0.33272(10) 0.0687(4) Uani 1 1 d . . . 
C1 C 0.4305(3) 0.0515(2) -0.24436(14) 0.0613(5) Uani 1 1 d . . . 
H1A H 0.4633 0.1025 -0.2978 0.092 Uiso 1 1 calc R . . 
H1B H 0.2724 0.0344 -0.2408 0.092 Uiso 1 1 calc R . . 
H1C H 0.4983 -0.0220 -0.2567 0.092 Uiso 1 1 calc R . . 
C13 C 0.9054(3) 0.2531(2) 0.50289(14) 0.0621(6) Uani 1 1 d . . . 
C14 C 0.7018(4) 0.1670(3) 0.4769(2) 0.1038(10) Uani 1 1 d . . . 
H14A H 0.5987 0.2052 0.4371 0.156 Uiso 1 1 calc R . . 
H14B H 0.6324 0.1440 0.5374 0.156 Uiso 1 1 calc R . . 
H14C H 0.7453 0.0971 0.4398 0.156 Uiso 1 1 calc R . . 
C3 C 1.4064(3) 0.4352(2) -0.20743(17) 0.0680(6) Uani 1 1 d . . . 
H3A H 1.3353 0.4162 -0.2721 0.102 Uiso 1 1 calc R . . 
H3B H 1.5642 0.4332 -0.2130 0.102 Uiso 1 1 calc R . . 
H3C H 1.3744 0.5138 -0.1826 0.102 Uiso 1 1 calc R . . 
C15 C 0.8417(6) 0.3623(3) 0.5630(2) 0.1238(12) Uani 1 1 d . . . 
H15A H 0.9717 0.4168 0.5778 0.186 Uiso 1 1 calc R . . 
H15B H 0.7772 0.3389 0.6244 0.186 Uiso 1 1 calc R . . 
H15C H 0.7355 0.4009 0.5251 0.186 Uiso 1 1 calc R . . 
C16 C 1.0851(4) 0.1950(3) 0.55476(17) 0.0932(9) Uani 1 1 d . . . 
H16A H 1.1250 0.1276 0.5133 0.140 Uiso 1 1 calc R . . 
H16B H 1.0326 0.1686 0.6174 0.140 Uiso 1 1 calc R . . 
H16C H 1.2130 0.2517 0.5668 0.140 Uiso 1 1 calc R . . 
O1 O 0.98597(19) 0.40690(12) -0.15616(10) 0.0606(4) Uani 1 1 d . . . 
 
loop_ 
 _atom_site_aniso_label 
 _atom_site_aniso_U_11 
 _atom_site_aniso_U_22 
 _atom_site_aniso_U_33 
 _atom_site_aniso_U_23 
 _atom_site_aniso_U_13 
 _atom_site_aniso_U_12 
O6 0.0447(6) 0.0440(7) 0.0416(7) 0.0037(6) 0.0050(5) 0.0138(5) 
C8 0.0362(8) 0.0348(10) 0.0363(9) 0.0067(8) 0.0076(7) 0.0034(7) 
C6 0.0341(8) 0.0297(9) 0.0361(10) 0.0023(7) 0.0032(7) 0.0036(7) 
O5 0.0383(6) 0.0777(10) 0.0508(8) -0.0116(7) 0.0126(6) 0.0066(6) 
C9 0.0319(8) 0.0356(9) 0.0334(9) 0.0011(8) 0.0052(7) 0.0045(7) 
O2 0.0426(7) 0.0612(9) 0.0724(9) 0.0301(8) 0.0192(6) 0.0055(6) 
C7 0.0320(8) 0.0430(10) 0.0387(10) 0.0051(8) 0.0032(7) -0.0040(7) 
C5 0.0342(8) 0.0320(9) 0.0322(9) 0.0025(7) 0.0059(7) 0.0045(7) 
C4 0.0390(9) 0.0317(10) 0.0368(10) 0.0000(8) 0.0036(7) 0.0021(7) 
C10 0.0332(8) 0.0392(10) 0.0402(10) 0.0008(8) 0.0045(7) -0.0022(7) 
O4 0.0425(7) 0.0576(8) 0.0451(8) -0.0055(6) -0.0057(5) -0.0049(6) 
C11 0.0383(9) 0.0429(10) 0.0372(10) -0.0021(8) 0.0030(7) -0.0001(7) 
O8 0.0723(8) 0.0557(8) 0.0346(7) -0.0031(6) 0.0139(6) 0.0026(6) 
C2 0.0419(9) 0.0344(10) 0.0359(10) 0.0056(8) 0.0030(7) 0.0011(7) 
O3 0.0600(8) 0.0960(12) 0.0472(9) -0.0204(8) 0.0141(7) -0.0156(7) 
C12 0.0443(9) 0.0479(12) 0.0347(10) 0.0002(9) -0.0003(7) 0.0016(8) 
O7 0.1118(11) 0.0498(9) 0.0464(8) 0.0077(7) 0.0186(7) 0.0105(8) 
C1 0.0625(12) 0.0682(14) 0.0488(12) -0.0003(11) -0.0152(9) -0.0106(10) 
C13 0.0732(13) 0.0745(15) 0.0392(11) 0.0057(11) 0.0188(10) 0.0042(11) 
C14 0.0753(16) 0.154(3) 0.0785(19) 0.0161(19) 0.0250(13) -0.0221(16) 
C3 0.0621(12) 0.0671(16) 0.0769(16) 0.0312(13) 0.0201(11) -0.0070(10) 
C15 0.194(3) 0.119(3) 0.0646(18) -0.0009(18) 0.0616(19) 0.042(2) 
C16 0.0964(18) 0.138(3) 0.0485(14) 0.0256(15) 0.0047(12) 0.0165(17) 
O1 0.0503(7) 0.0606(9) 0.0762(10) 0.0342(8) 0.0075(7) 0.0108(7) 
 
_geom_special_details 
; 
 All esds (except the esd in the dihedral angle between two l.s. planes) 
 are estimated using the full covariance matrix.  The cell esds are taken 
 into account individually in the estimation of esds in distances, angles 
 and torsion angles; correlations between esds in cell parameters are only 
 used when they are defined by crystal symmetry.  An approximate (isotropic) 
 treatment of cell esds is used for estimating esds involving l.s. planes. 
; 
 
loop_ 
 _geom_bond_atom_site_label_1 
 _geom_bond_atom_site_label_2 
 _geom_bond_distance 
 _geom_bond_site_symmetry_2 
 _geom_bond_publ_flag 
O6 C9 1.4285(18) . ? 
O6 H6 0.8200 . ? 
C8 O5 1.2100(17) . ? 
C8 C7 1.498(2) . ? 
C8 C9 1.531(2) . ? 
C6 C2 1.504(2) . ? 
C6 C5 1.530(2) . ? 
C6 C7 1.538(2) . ? 
C6 H6A 0.9800 . ? 
C9 C10 1.523(2) . ? 
C9 C11 1.524(2) . ? 
O2 C4 1.3281(18) . ? 
O2 C3 1.438(2) . ? 
C7 H7A 0.9700 . ? 
C7 H7B 0.9700 . ? 
C5 C4 1.502(2) . ? 
C5 C10 1.540(2) . ? 
C5 H5 0.9800 . ? 
C4 O1 1.1950(18) . ? 
C10 H10A 0.9700 . ? 
C10 H10B 0.9700 . ? 
O4 C2 1.3245(19) . ? 
O4 C1 1.440(2) . ? 
C11 C12 1.501(2) . ? 
C11 H11A 0.9700 . ? 
C11 H11B 0.9700 . ? 
O8 C12 1.318(2) . ? 
O8 C13 1.484(2) . ? 
C2 O3 1.1968(18) . ? 
C12 O7 1.211(2) . ? 
C1 H1A 0.9600 . ? 
C1 H1B 0.9600 . ? 
C1 H1C 0.9600 . ? 
C13 C16 1.497(3) . ? 
C13 C15 1.506(3) . ? 
C13 C14 1.515(3) . ? 
C14 H14A 0.9600 . ? 
C14 H14B 0.9600 . ? 
C14 H14C 0.9600 . ? 
C3 H3A 0.9600 . ? 
C3 H3B 0.9600 . ? 
C3 H3C 0.9600 . ? 
C15 H15A 0.9600 . ? 
C15 H15B 0.9600 . ? 
C15 H15C 0.9600 . ? 
C16 H16A 0.9600 . ? 
C16 H16B 0.9600 . ? 
C16 H16C 0.9600 . ? 
 
loop_ 
 _geom_angle_atom_site_label_1 
 _geom_angle_atom_site_label_2 
 _geom_angle_atom_site_label_3 
 _geom_angle 
 _geom_angle_site_symmetry_1 
 _geom_angle_site_symmetry_3 
 _geom_angle_publ_flag 
C9 O6 H6 109.5 . . ? 
O5 C8 C7 123.81(14) . . ? 
O5 C8 C9 121.29(15) . . ? 
C7 C8 C9 114.73(12) . . ? 
C2 C6 C5 110.67(12) . . ? 
C2 C6 C7 111.36(13) . . ? 
C5 C6 C7 112.77(12) . . ? 
C2 C6 H6A 107.2 . . ? 
C5 C6 H6A 107.2 . . ? 
C7 C6 H6A 107.2 . . ? 
O6 C9 C10 107.37(11) . . ? 
O6 C9 C11 112.28(12) . . ? 
C10 C9 C11 111.03(14) . . ? 
O6 C9 C8 108.15(13) . . ? 
C10 C9 C8 106.13(12) . . ? 
C11 C9 C8 111.59(12) . . ? 
C4 O2 C3 117.44(13) . . ? 
C8 C7 C6 108.86(14) . . ? 
C8 C7 H7A 109.9 . . ? 
C6 C7 H7A 109.9 . . ? 
C8 C7 H7B 109.9 . . ? 
C6 C7 H7B 109.9 . . ? 
H7A C7 H7B 108.3 . . ? 
C4 C5 C6 110.75(12) . . ? 
C4 C5 C10 107.64(13) . . ? 
C6 C5 C10 112.26(12) . . ? 
C4 C5 H5 108.7 . . ? 
C6 C5 H5 108.7 . . ? 
C10 C5 H5 108.7 . . ? 
O1 C4 O2 122.22(16) . . ? 
O1 C4 C5 125.73(14) . . ? 
O2 C4 C5 111.92(13) . . ? 
C9 C10 C5 113.56(13) . . ? 
C9 C10 H10A 108.9 . . ? 
C5 C10 H10A 108.9 . . ? 
C9 C10 H10B 108.9 . . ? 
C5 C10 H10B 108.9 . . ? 
H10A C10 H10B 107.7 . . ? 
C2 O4 C1 117.09(13) . . ? 
C12 C11 C9 112.18(14) . . ? 
C12 C11 H11A 109.2 . . ? 
C9 C11 H11A 109.2 . . ? 
C12 C11 H11B 109.2 . . ? 
C9 C11 H11B 109.2 . . ? 
H11A C11 H11B 107.9 . . ? 
C12 O8 C13 121.68(15) . . ? 
O3 C2 O4 122.82(16) . . ? 
O3 C2 C6 124.84(15) . . ? 
O4 C2 C6 112.31(13) . . ? 
O7 C12 O8 124.40(17) . . ? 
O7 C12 C11 122.55(16) . . ? 
O8 C12 C11 113.04(16) . . ? 
O4 C1 H1A 109.5 . . ? 
O4 C1 H1B 109.5 . . ? 
H1A C1 H1B 109.5 . . ? 
O4 C1 H1C 109.5 . . ? 
H1A C1 H1C 109.5 . . ? 
H1B C1 H1C 109.5 . . ? 
O8 C13 C16 110.04(15) . . ? 
O8 C13 C15 102.47(18) . . ? 
C16 C13 C15 111.8(2) . . ? 
O8 C13 C14 109.28(17) . . ? 
C16 C13 C14 112.4(2) . . ? 
C15 C13 C14 110.4(2) . . ? 
C13 C14 H14A 109.5 . . ? 
C13 C14 H14B 109.5 . . ? 
H14A C14 H14B 109.5 . . ? 
C13 C14 H14C 109.5 . . ? 
H14A C14 H14C 109.5 . . ? 
H14B C14 H14C 109.5 . . ? 
O2 C3 H3A 109.5 . . ? 
O2 C3 H3B 109.5 . . ? 
H3A C3 H3B 109.5 . . ? 
O2 C3 H3C 109.5 . . ? 
H3A C3 H3C 109.5 . . ? 
H3B C3 H3C 109.5 . . ? 
C13 C15 H15A 109.5 . . ? 
C13 C15 H15B 109.5 . . ? 
H15A C15 H15B 109.5 . . ? 
C13 C15 H15C 109.5 . . ? 
H15A C15 H15C 109.5 . . ? 
H15B C15 H15C 109.5 . . ? 
C13 C16 H16A 109.5 . . ? 
C13 C16 H16B 109.5 . . ? 
H16A C16 H16B 109.5 . . ? 
C13 C16 H16C 109.5 . . ? 
H16A C16 H16C 109.5 . . ? 
H16B C16 H16C 109.5 . . ? 
 
_diffrn_measured_fraction_theta_max    0.962 
_diffrn_reflns_theta_full              25.00 
_diffrn_measured_fraction_theta_full   0.962 
_refine_diff_density_max    0.184 
_refine_diff_density_min   -0.138 
_refine_diff_density_rms    0.033 
